# Supplementary material for: Defining Recovery From Alcohol Use Disorder: Development of an NIAAA Research Definition
Source: Atypon-hosted journal article supplement (doi:10.1176/appi.ajp.21090963), 2022-04-12
Supplement: ajp_21090963_correction01.pdf [file ajp_21090963_correction01.pdf]

## **Correction to Hagman et al.**

When the article “Defining Recovery From Alcohol Use Disorder: Development of an NIAAA Research Definition,” by Brett T. Hagman, Ph.D., et al. (doi: 10.1176/appi.ajp.21090963) was published online on April 12, 2022, Table 1 incorrectly reported that the Recovery Science Research Collaborative’s definition of recovery from substance use disorder is an abstinence-focused one. The table was corrected and the article was reposted online on May 2, 2022.
